# Supplementary material
Source: publisher site journal article supplement (https://www.spandidos-publications.com/7531/downloadSupplementary)
Supplement: Supplementary file 1 [file downloadSupplementary]

## Sheet: Sheet1
Table SI. Top 200 genes contributing to the PC2 (Dim2) in the PCA performed on normalized transcriptomic data (log₂ TPM) of TCGA-STAD samples.
Gene	Loading_PC2	Cos2_PC2	Contribution of PC2, %
IGKC	1.91734e+08	0.657645	71.5831
MT-CO1	9.13981e+07	0.181222	16.2662
MT-CO3	3.89594e+07	0.0441007	2.95554
MT-CYB	2.73783e+07	0.054017	1.45957
MT-ND4	2.09332e+07	0.0190248	0.853264
IGHG1	1.67683e+07	0.189763	0.547508
MT-ND1	1.44463e+07	0.0300773	0.406373
MT-CO2	1.24687e+07	0.005642	0.302729
MT-RNR2	1.19605e+07	0.0073949	0.278553
IGLC2	1.10053e+07	0.309586	0.23584
MT-ND3	9.07554e+06	0.0124217	0.160382
IGKV3-20	7.60484e+06	0.14066	0.112614
MT-ND6	7.36852e+06	0.0496548	0.105724
IGKV4-1	7.14956e+06	0.174605	0.0995335
IGHA2	6.92521e+06	0.202166	0.093385
IGHM	6.67604e+06	0.172331	0.0867858
MT-ND2	6.26549e+06	0.0044517	0.07644
ACTG1	-6.05367e+06	0.0867003	0.0713589
IGLV2-14	5.37136e+06	0.12853	0.0561796
MT-ND5	5.26425e+06	0.0349742	0.0539615
JCHAIN	4.64585e+06	0.205925	0.0420283
ACTB	-4.37093e+06	0.038737	0.0372014
TMSB10	-4.2622e+06	0.0211915	0.0353735
MT-ATP6	3.98892e+06	0.00232725	0.0309828
CD24	-3.97463e+06	0.0125208	0.0307613
PGC	3.97212e+06	0.00132396	0.0307224
IGLC3	3.92895e+06	0.0720223	0.0300583
IGHV5-51	3.91411e+06	0.244128	0.0298316
IGKV3-11	3.86153e+06	0.069787	0.0290355
S100A11	-3.82753e+06	0.033509	0.0285266
GAPDH	-3.78678e+06	0.103186	0.0279223
S100A6	-3.73129e+06	0.048542	0.02711
IGLV1-40	3.36567e+06	0.162497	0.0220574
HSP90AB1	-3.24162e+06	0.0588392	0.0204614
IGHG2	3.1448e+06	0.20096	0.0192573
IGHV4-39	3.12339e+06	0.104886	0.018996
RPS12	-3.09262e+06	0.0426993	0.0186236
IGHV3-30	3.08511e+06	0.167573	0.0185332
MT-RNR1	2.97762e+06	0.00484978	0.0172643
EEF2	-2.90364e+06	0.0858704	0.0164171
IGHV1-18	2.89943e+06	0.0976296	0.0163695
LCN2	-2.86897e+06	0.00318925	0.0160274
IGLV3-21	2.85968e+06	0.0750823	0.0159237
IGHV3-33	2.85279e+06	0.0811584	0.0158471
IGLV4-69	2.71137e+06	0.0855254	0.0143149
TFF1	2.71031e+06	0.00592639	0.0143037
COL1A1	-2.70131e+06	0.0200864	0.0142089
IGLV2-11	2.60509e+06	0.200786	0.0132146
MT-ND4L	2.59625e+06	0.00169363	0.0131252
IGKV3-15	2.58186e+06	0.172594	0.0129801
IGHGP	2.57954e+06	0.141162	0.0129567
PLA2G2A	-2.53944e+06	0.00650906	0.012557
IGHG3	2.53402e+06	0.292319	0.0125035
IGLV1-47	2.43425e+06	0.0707806	0.0115383
IGLV3-19	2.42367e+06	0.060937	0.0114382
GKN1	2.3944e+06	0.00483862	0.0111636
IGLV2-23	2.37483e+06	0.163858	0.0109818
KRT19	-2.3498e+06	0.0338043	0.0107516
CD74	2.2524e+06	0.0204455	0.00987874
RPS2	-2.22655e+06	0.0634944	0.00965332
PPDPF	-2.18643e+06	0.0480545	0.00930858
IGHV3-21	2.17017e+06	0.0599776	0.00917066
IGLV3-25	2.1627e+06	0.0722908	0.00910761
RPL8	-2.1308e+06	0.0462465	0.00884091
CEACAM6	-2.11422e+06	0.0501705	0.00870386
IGLV1-44	2.02864e+06	0.154197	0.00801345
IGHV3-15	1.9613e+06	0.0686688	0.0074903
OLFM4	1.92771e+06	0.0019294	0.0072359
CEACAM5	-1.91382e+06	0.0299299	0.00713207
IGLV6-57	1.89096e+06	0.0510803	0.00696266
S100A9	-1.82727e+06	0.00221043	0.00650156
IGHV3-7	1.78687e+06	0.0800536	0.00621722
IGHV3-48	1.73264e+06	0.0637336	0.00584556
IGHG4	1.71243e+06	0.0637521	0.00571
S100A10	-1.68814e+06	0.0240042	0.00554915
IGHV4-59	1.64345e+06	0.10368	0.00525924
RPS18	-1.61941e+06	0.0450791	0.00510653
RPS21	-1.6056e+06	0.0370399	0.0050198
RPS11	-1.60405e+06	0.0316672	0.00501011
IGKV1-16	1.56778e+06	0.19177	0.00478612
RPL7A	-1.5615e+06	0.0670663	0.00474786
IGHV1-2	1.5505e+06	0.0709993	0.00468116
IGHV2-5	1.47917e+06	0.103361	0.00426034
RPL10A	-1.4754e+06	0.0955621	0.00423871
IGHV4-34	1.47015e+06	0.133043	0.00420854
IGHV1-3	1.44013e+06	0.0775923	0.00403843
IGKV2-30	1.43931e+06	0.132041	0.00403385
RPLP0	-1.34215e+06	0.057084	0.00350761
HSPB1	-1.29493e+06	0.0156569	0.00326515
IGHV3-49	1.27482e+06	0.0486522	0.00316451
FTH1	-1.27091e+06	0.0446823	0.00314516
IGKV1-9	1.25443e+06	0.102426	0.00306408
IGHV1-24	1.24467e+06	0.142896	0.00301662
JUP	-1.23589e+06	0.00559875	0.00297421
HSPA8	-1.21894e+06	0.0827751	0.0028932
DES	-1.21338e+06	0.00180907	0.00286686
IFITM3	-1.21249e+06	0.0136423	0.00286264
RPL19	-1.20756e+06	0.0308601	0.0028394
KRT8	-1.20048e+06	0.0480563	0.00280622
EEF1A1	-1.19104e+06	0.0454096	0.00276224
HMGA1	-1.18746e+06	0.0520917	0.00274567
TAGLN2	-1.17663e+06	0.0764766	0.00269581
CHCHD2	-1.15194e+06	0.0917581	0.00258385
IGKV1-27	1.1425e+06	0.0570924	0.0025417
RPS6	-1.12366e+06	0.0350446	0.00245857
HSP90AA1	-1.11687e+06	0.0855023	0.00242895
GSTP1	-1.11257e+06	0.0476428	0.00241026
IGLV2-8	1.09844e+06	0.111662	0.00234943
S100P	-1.08692e+06	0.00774212	0.00230043
RPL29	-1.07839e+06	0.04537	0.00226443
IGKV1-6	1.07252e+06	0.109083	0.00223986
SLC25A6	-1.05881e+06	0.0416966	0.00218298
COL1A2	-1.03184e+06	0.0264123	0.00207318
IGHV3-74	1.02568e+06	0.0872935	0.00204849
EPCAM	-1.02545e+06	0.0646008	0.00204759
RPS15	-1.02039e+06	0.0509071	0.00202742
LIPF	997587	0.000359706	0.00193782
SPARC	-994214	0.028491	0.00192474
RPL12	-993002	0.0683152	0.00192005
RPS4X	-986191	0.0271913	0.0018938
LYZ	979065	0.00104441	0.00186653
RPL35	-971461	0.0467524	0.00183765
AGR2	-956169	0.00434677	0.00178025
PTMA	-950324	0.0545429	0.00175855
ACTN4	-949488	0.0699499	0.00175546
RPLP1	-945348	0.0427848	0.00174018
IGKV1-17	943762	0.0697791	0.00173435
RPLP2	-939059	0.0246143	0.00171711
SST	-935931	0.00410632	0.00170569
PSAP	-929279	0.0145497	0.00168152
SPRR3	-921491	0.00230389	0.00165346
MARCKSL1	-919700	0.0760547	0.00164704
IGHV1-69D	919244	0.00904656	0.00164541
IGLV3-10	918689	0.104087	0.00164342
RPS8	-917571	0.0573031	0.00163942
IGHV3-11	913482	0.11748	0.00162484
RPL3	-912287	0.05447	0.00162059
TFF2	901969	0.00333216	0.00158414
RPL13	-898800	0.0362947	0.00157303
RPL41	-898227	0.0341548	0.00157103
SFN	-894402	0.0345665	0.00155767
IGHV1-58	890320	0.0466648	0.00154349
LGALS3BP	-890140	0.033617	0.00154286
IGKV1-12	885551	0.0764008	0.001527
KRT4	-884217	0.00194707	0.0015224
TMSB4X	-875682	0.00754537	0.00149315
RPL13A	-868682	0.0265822	0.00146938
ATP5F1B	-868158	0.0439222	0.0014676
SH3BGRL3	-857260	0.0252079	0.00143099
MALAT1	853071	0.0114887	0.00141704
LGALS3	-846988	0.0374168	0.0013969
IGHV6-1	846272	0.0419098	0.00139454
PABPC1	-842978	0.0409938	0.00138371
RPL23A	-833561	0.0538039	0.00135296
IGLV8-61	809524	0.0398431	0.00127606
IGLV7-46	801814	0.0130424	0.00125187
TFF3	-800889	0.0205951	0.00124898
IGKV3D-20	791158	0.0735304	0.00121881
ATP1B1	-789132	0.0441409	0.00121258
PKM	-786782	0.0991159	0.00120537
MUC13	-785159	0.0309751	0.0012004
EZR	-769303	0.0586151	0.00115241
CALR	-768273	0.0376155	0.00114932
ENO1	-766601	0.0703775	0.00114433
ALB	-756982	0.00256611	0.00111579
RPS5	-741492	0.060359	0.00107059
NOTUM	-738761	0.00810975	0.00106272
BSG	-734038	0.0847076	0.00104918
RPL10	-731547	0.0373926	0.00104207
RPS16	-727532	0.032409	0.00103066
CLIC1	-727179	0.0501931	0.00102966
SLC25A5	-719516	0.0568647	0.00100807
PIGR	718747	0.00279685	0.00100592
CLDN3	-711016	0.0391493	0.000984395
LGALS1	-707102	0.0269531	0.000973589
TUBB4B	-705997	0.0767503	0.000970546
RPL7	-702602	0.0323943	0.000961235
HLA-C	-698792	0.00562589	0.000950838
RPS2P5	-694418	0.0339097	0.000938973
SPP1	-684809	0.0173291	0.000913167
IGHV4-31	683414	0.108219	0.00090945
IGHV1-46	683368	0.0907976	0.000909327
TUBB	-681060	0.072347	0.000903197
IGHV4-4	677082	0.0448868	0.000892676
MT-ATP8	-676944	0.000738338	0.000892312
S100A8	-671951	0.00201969	0.000879197
IGLC7	668170	0.0300523	0.000869331
RPL4	-668151	0.0505995	0.000869281
GAST	659415	0.050562	0.000846698
The table includes gene names, PC2 loadings, cos² values (quality of representation) and contribution percentages. PC, principal component; PCA, PC analysis; TPM, transcripts per million; TCGA, The Cancer Genome Atlas; STAD, stomach adenocarcinoma.
